# Supplementary material for: Near infrared dye-labelled polymeric micro- and nanomaterials:in vivoimaging and evaluation of their local persistence
Source: Royal Society of Chemistry journal article supplement (doi:10.1039/c7nr07345c), 2018-01-01
Supplement: c7nr07345c1.pdf [file c7nr07345c1.pdf]

## Supplementary Material

### Near infrared dye-labeled polymeric micro- and nanomaterials: *in vivo* imaging and evaluation of their local persistence

*Gracia Mendoza<sup>a,b,†\*</sup>, Isabel Ortiz de Solorzano<sup>a,b,c,†</sup>, Inmaculada Pintre<sup>a</sup>, Sara Garcia-Salinas<sup>a,b,c</sup>, Victor Sebastian<sup>a,b,c</sup>, Vanesa Andreu<sup>a,b</sup>, Marina Gimeno<sup>d</sup>, Manuel Arruebo<sup>a,b,c</sup>*

<sup>a</sup>Department of Chemical Engineering. Aragon Institute of Nanoscience (INA), University of Zaragoza, Campus Río Ebro-Edificio I+D, C/ Poeta Mariano Esquillor S/N, 50018-Zaragoza, Spain

<sup>b</sup>Aragon Health Research Institute (IIS Aragón), 50009 Zaragoza, Spain

<sup>c</sup>Networking Research Center on Bioengineering, Biomaterials and Nanomedicine, CIBER-BBN, 28029-Madrid, Spain

<sup>d</sup>Department of Animal Pathology, University of Zaragoza, C/ Miguel Servet 177, 50013-Zaragoza, Spain

<sup>†</sup>Both authors contributed equally to this work

\*Address correspondence to [gmmenc@unizar.es](mailto:gmmenc@unizar.es)

## SUPPLEMENTARY EXPERIMENTAL PROCEDURES

### Materials

Poly(lactic-co-glycolic) acid (PLGA) 50:50 (MW 24-38 kDa), N-(3-dimethylaminopropyl)-N'-ethylcarbodiimide hydrochloride (EDC-HCl) 99%, N-hydroxysuccinimide (NHS) 98%, triethylamine 98%, 6-aminocaproic acid (titration powder), 1,6-hexanediamine 98%, N-isopropylacrylamide  $\geq 99\%$ , N-isopropylmethacrylamide 97%, acrylamide  $>99\%$ , N,N'-methylenebis(acrylamide) 99%, ammonium persulfate  $\geq 98\%$ , Span® 80, polyN-isopropylacrylamide (PNIPAM) amine terminated (PNIPAM-NH<sub>2</sub>) average Mn 5000 and IR-820 80% dye were purchased from Sigma-Aldrich (Germany). The solvents Hexadecane, ReagentPlus®, 99%, dimethylformamide anhydrous (DMF) 99.8%, ethyl acetate (AcEt), dichloromethane (DCM) and acetone HPLC were also acquired from Sigma-Aldrich (Germany) while methanol (HPLC quality) was obtained from Acros Organics (Belgium). Free endotoxin water was purchased from Alfa-Aesar (UK) while paraformaldehyde 4% in PBS was acquired from Affymetrix (UK) and absolute ethanol from Merck (Germany).

Dialysis membranes benzoylated with an average flat width of 9 mm and molecular weight cut off of 2 kDa were purchased from Sigma-Aldrich (Germany). Silica gel with particle size 63-100  $\mu\text{m}$  (150-230 mesh ASTM) was purchased from Riedel-de Haën (Germany).

### Synthesis of PLGA and PNIPAM tagged materials

#### *Synthesis of IR820-COOH*

A round bottom flask containing 150 mg of IR-820 (80% dye, 0.141 mmol, 1 eq.) and 63 mg of 6-aminocaproic acid (0.480 mmol, 3.4 eq.) was purged with argon prior to the addition of 5 mL of dry DMF and 0.1 mL of triethylamine. The green solution was

stirred and heated in a pre-warmed oil bath at 85 °C for 3 h under argon atmosphere and protected from the light. The mixture upon reaction turned into a deep blue colour and after completing the reaction time the stirring was stopped, the reaction was cooled down and the solvent evaporated under vacuum to dryness. The crude was purified by column chromatography using a polarity gradient (ethyl acetate-methanol 7:3 to 3:2). The efficiency of the reaction was 78.7% obtaining 105 mg of IR820-COOH.

#### *Synthesis of IR820-NH<sub>2</sub>*

A round bottom flask containing 150 mg of IR-820 (80% dye, 0.142 mmol, 1 eq.) and 20.52 mg of 1,6-hexanediamine (0.142 mmol, 1 eq.) was purged with argon. 25 mL of dry DMF and 0.1 mL of triethylamine were added. The green solution, under argon atmosphere, was protected from the light, stirred and heated in a pre-warmed oil bath at 85 °C for 3 h. After completing the reaction time the stirring was stopped, the blue mixture was cooled down and the solvent evaporated under vacuum to dryness. The crude was purified by column chromatography using a polarity gradient (ethyl acetate-methanol 7:3 to pure methanol) obtaining an efficiency of 47.7% (63 mg of IR820-NH<sub>2</sub>).

#### *Synthesis of PLGA-IR820*

The carboxylic group of the polymer was first activated through reaction with EDC and NHS followed by the coupling reaction with IR820-NH<sub>2</sub>. Then, 100 mg of PLGA (3.2 μmol, 1 eq) were stirred with 6.1 mg of EDC (32 μmol, 10 eq.) and 3.7 mg of NHS (32 μmol, 10 eq) in 1 mL of dry DMF under argon atmosphere at room temperature. After 2 h of reaction, a solution of IR820-NH<sub>2</sub> was prepared under argon atmosphere in a round bottom flask, protected from the light with 3.6 mg of IR820-NH<sub>2</sub> (3.8 μmol, 1.2 eq.) dissolved in 134 μL of triethylamine-dry DMF (20 μL in 2 mL of DMF, 15.2 μmol, 4 eq.) and 100 μL of dry DMF. The content of the vial was then added to the dye mixture

and later washed with a total amount of 600  $\mu\text{L}$  of dry DMF. The mixture was stirred at room temperature overnight protected from the light. After, the solvent was evaporated to dryness under vacuum and the solid obtained was purified dissolving it in acetone (3 mL) and precipitated with methanol (30 mL) for 3 times. 93 mg of polymer were obtained (90% efficiency).

#### *Synthesis of PNIPAM-IR820*

In this procedure, the carboxylic group of IR820-COOH was first activated through reaction with EDC and NHS followed by the coupling reaction with PNIPAM. In a round bottom flask protected from the light, 20.6 mg of IR820-COOH (21.8  $\mu\text{mol}$ , 1.2 eq.) were stirred with 16.8 mg of EDC (87.6  $\mu\text{mol}$ , 4.8 eq.) and 10 mg of NHS (86.9  $\mu\text{mol}$ , 4.8 eq.) in 1 mL of dry DMF under argon atmosphere at room temperature. After 2 h of reaction, a solution of PNIPAM was added under argon atmosphere over the activated IR820-COOH. PNIPAM (100 mg, 18.2  $\mu\text{mol}$ , 1 eq.) was dissolved in 800  $\mu\text{L}$  of dry DMF and 6.8  $\mu\text{L}$  of triethylamine (92.5  $\mu\text{mol}$ , 5 eq.) added as a solution in DMF (40  $\mu\text{L}$  TEA in 1 mL of DMF, 170  $\mu\text{L}$  of the solution). The vial was washed with 500  $\mu\text{L}$  of dry DMF and the solution added to the reaction mixture. The mixture was stirred at room temperature overnight and protected from the light. After, the solvent was evaporated to dryness under vacuum, methanol was added to remove the remaining DMF in the crude reaction and the solid obtained was purified by dialysis against water for 3 days. After lyophilisation, 86 mg of PNIPAM-IR820 were obtained (78% efficiency).

#### **Preparation of fluorescent labeled polymeric nanoparticles**

Labeled PLGA by the amino-modified IR820 (PLGA-IR820-NH<sub>2</sub>), PLGA encapsulating the NIR dye (PLGA-IR820 encapsulated), tagged PNIPAM by the acidic-modified IR820 added during the polymer synthesis (PNIPAM-IR820-COOH) or after

the synthesis (PNIPAM-IR820-COOH post-synthesis), labeled PNIPAM microgels by the fluorophore (PNIPAM-IR820 microgels) and tagged PNIPAM microparticles (MPs) by IR820 (PNIPAM-IR820 microparticles) were prepared as follows. The tagged nanoparticles (NPs) were synthesized with the pre-labeled materials (PLGA IR820-NH<sub>2</sub> NPs and PNIPAM-IR820-COOH NPs) or were first synthesized and then labeled with the modified dye (PNIPAM-IR820-COOH post-synthesis NPs) or with the commercial IR-820 (PLGA-IR820 encapsulated NPs, PNIPAM-IR820 microgels and PNIPAM-IR820 microparticles).

#### *Preparation of PLGA nanoparticles*

50 mg of the pre-synthesized PLGA-IR820-NH<sub>2</sub> polymer were dissolved with 150 mg of Pluronic-F68 in 5 mL of ethyl acetate. 10 mL of water were then added to the solution and the mixture was sonicated 25 sec in an ice bath with a sonicator probe at 40% of amplitude. The cloudy suspension was stirred for several hours until the complete evaporation of the organic solvent. The remaining aqueous suspension was centrifuged (10 min, 4500 rpm) to concentrate NPs which were finally resuspended in water to a final volume of 10 mL.

The encapsulation of IR-820 in PLGA (PLGA-IR820 encapsulated NPs) was performed following also the procedure explained above but with slight modifications. Commercial PLGA-COOH was used and 625 µg of IR-820 were added to the initial ethyl acetate solution. The cleaning centrifugation step was performed twice in order to remove the not encapsulated dye.

#### *Preparation of PNIPAM nanoparticles*

25 mg of the corresponding PNIPAM polymer and 125 mg of Pluronic-F68 were dissolved in 5 mL of chloroform and subsequently 10 mL of water were added. The mixture was sonicated for 25 sec with a sonicator probe at 40% of amplitude in an ice

bath. The cloudy suspension was stirred at 700 rpm for several hours to evaporate chloroform. The remaining aqueous phase was centrifuged for 10 min at 4500 rpm to remove the supernatant containing the polymeric material not incorporated into the NPs. NPs were then resuspended in water to a final volume of 10 mL.

#### *Procedure to functionalize pre-synthesized PNIPAM nanoparticles*

The carboxylic acid group of IR820-COOH was activated prior to the reaction with PNIPAM. 4.5 mg of the dye (4.54  $\mu\text{mol}$ , 1 eq.) were stirred for 1 h at room temperature with 8.7 mg of EDC (45.4  $\mu\text{mol}$ , 10 eq.) and 5.23 mg of NHS (45.4  $\mu\text{mol}$ , 10 eq.) in 1 mL of water. The activated dye was then added to 10 mL of the PNIPAM nanoparticle suspension (25 mg of PNIPAM, 4.54  $\mu\text{mol}$ , 1 eq.) and the mixture was stirred at room temperature overnight. NPs were finally centrifuged for 10 min at 4500 rpm, the supernatant was removed and the pellet containing the NPs was resuspended in 10 mL of water and centrifuged again to discard the excess of dye and EDC/NHS.

#### *Preparation of PNIPAM microgels*

PNIPAm microgels were synthesized following the protocol of Timko et al [1]. Briefly, N-isopropylacrylamide (0.6 g), N-isopropylacrylmethylamine (0.8 g), acrylamide (50 mg) and N,N'-methylenebisacrylamide (80 mg) were dissolved in 150 mL distilled deionized water (DDI) previously degassed with argon at least for 15 min. The solution was again degassed through vacuum-argon cycles and heated to 70 °C. Ammonium persulfate initiator (5 mL of 20 mg/mL solution in DDI) was then added to the solution with high stirring. After 6 h under argon atmosphere, the reaction was stopped and the particles were dialyzed against DDI water to remove unreacted monomer following lyophilisation.

### *Preparation of PNIPAM microparticles*

PNIPAM microparticles (MPs) were prepared following Choi et al protocol [2] with some modifications. To synthesize PNIPAM MPs of an average diameter of around 400  $\mu\text{m}$ , a coaxial microreactor was used. The dispersed aqueous phase flow with the monomer (NIPAM 20% w/w) and crosslinker (BIS 5% w/w) was 10  $\mu\text{L}/\text{min}$  while the hexadecane continuous phase flow with Span 80 (5% w/w) as surfactant and DEAP as photoinitiator (5% v/v) was 100  $\mu\text{L}/\text{min}$ . Photopolymerization was carried out with a 365 nm LED (UV light, 4.6W) to accelerate the polymerization step.

### *Loading of IR-820 commercial dye in PNIPAM microgels and microparticles*

Microgels or MPs were dispersed in water with a final concentration of 5 mg/mL and a polymer/dye weight ratio of 1:10 and kept in contact with the commercial IR-820 dye for 3 days. Then, they were washed twice by centrifugation to discard the non-encapsulated dye and resuspended in water in the case of microgels or in methylcellulose in the case of MPs to obtain homogenous dispersions with a final concentration of 5 mg/mL.

### **Characterization of tagged polymeric micro- and nanomaterials**

The formation of micro- and NPs as well as the modified IR-820 were monitored by UV-vis spectroscopy through a double-beam UV-vis spectrophotometer (PerkinElmer Lambda 35). PLGA and PNIPAM tagged micro- and nanomaterials were characterized regarding shape and size by using a scanning electron microscope (SEM) Inspect F50 (FEI Co., LMA-INA, Spain) operating at an accelerating voltage of 10-15 keV. The lower critical solution temperature (LCST) of the thermoresponsive polymer PNIPAM, un-modified and modified with the dye, was analysed by turbidimetry. In addition, Fourier transform infrared spectroscopy (FTIR) was performed on a Bruker Vertex 70 equipped with a DTGS detector and ATR Golden Gate Diamond. The scans were

developed in the range of 4000-400  $\text{cm}^{-1}$ . Mass spectrometry of the dyes was carried out in a Microtof-Q equipment whereas NMR spectroscopy was developed in a Bruker ARX-300 equipment to completely characterize the products obtained.

### **Supplementary references**

- [1] B.P. Timko, M. Arruebo, S.A. Shankarappa, J.B. McAlvin, O.S. Okonkwo, B. Mizrahi, et al., Near-infrared-actuated devices for remotely controlled drug delivery, *Proc. Natl. Acad. Sci.* 111 (2014) 1349–1354.  
doi:10.1073/pnas.1322651111.
- [2] C.-H. Choi, J.-H. Jung, D.-W. Kim, Y.-M. Chung, C.-S. Lee, Novel one-pot route to monodisperse thermosensitive hollow microcapsules in a microfluidic system., *Lab Chip.* 8 (2008) 1544–51. doi:10.1039/b804839h.



## SUPPLEMENTARY TABLES

**Table S1: IR820 dye concentration in the final materials (Mean  $\pm$  SD; n = 4)**

|                                                                | <b>PLGA-IR820<br/>encapsulated</b> | <b>PLGA-<br/>IR820-<br/>NH<sub>2</sub></b> | <b>PNIPAM-<br/>IR820-<br/>COOH</b> | <b>PNIPAM-<br/>IR820-COOH<br/>post-synthesis</b> | <b>PNIPAM-<br/>IR820<br/>microgels</b> | <b>PNIPAM-<br/>IR820<br/>microparticles</b> |
|----------------------------------------------------------------|------------------------------------|--------------------------------------------|------------------------------------|--------------------------------------------------|----------------------------------------|---------------------------------------------|
| <b>Dye<br/>concentration<br/>(<math>\mu\text{g/mL}</math>)</b> | 32.2 $\pm$ 3.7                     | 21.0 $\pm$ 0.5                             | 3.9 $\pm$ 0.3                      | 12.0 $\pm$ 3.5                                   | 28.5 $\pm$ 6.4                         | 48.6 $\pm$ 4.5                              |

**Table S2. Distribution of cell cycle phases for the different cell lines studied when treated with the dye-labelled materials synthesized (1 mg/mL)**

|                    | Cell cycle phases | Control | PLGA-IR820 encapsulated | PLGA-IR820-NH <sub>2</sub> | PNIPAM-IR820-COOH | PNIPAM-IR820-COOH post-synthesis | PNIPAM-IR820 microgels | PNIPAM-IR820 microparticles |
|--------------------|-------------------|---------|-------------------------|----------------------------|-------------------|----------------------------------|------------------------|-----------------------------|
| <b>mMSCs</b>       | <b>G1</b>         | 42.04   | 60.45                   | 31.94                      | 36.41             | 36.13                            | 26.71                  | 30.43                       |
|                    | <b>S</b>          | 30.53   | 21.11                   | 40.35                      | 35.94             | 44.53                            | 30.80                  | 37.80                       |
|                    | <b>G2</b>         | 27.43   | 18.44                   | 27.71                      | 27.65             | 19.34                            | 42.49                  | 31.77                       |
| <b>Macrophages</b> | <b>G1</b>         | 25.37   | 50.28                   | 36.35                      | 36.69             | 41.41                            | 56.36                  | 28.04                       |
|                    | <b>S</b>          | 46.53   | 29.88                   | 31.61                      | 33.69             | 21.62                            | 22.33                  | 48.30                       |
|                    | <b>G2</b>         | 28.10   | 19.85                   | 32.04                      | 29.62             | 36.98                            | 21.31                  | 23.66                       |
| <b>Monocytes</b>   | <b>G1</b>         | 50.82   | 45.00                   | 40.78                      | 41.23             | 47.02                            | 45.35                  | 45.64                       |
|                    | <b>S</b>          | 30.32   | 35.65                   | 39.65                      | 43.45             | 23.49                            | 34.18                  | 32.22                       |
|                    | <b>G2</b>         | 18.85   | 19.35                   | 19.57                      | 15.32             | 29.49                            | 20.48                  | 22.04                       |
| <b>U251MG</b>      | <b>G1</b>         | 50.24   | 63.86                   | 62.88                      | 61.94             | 71.05                            | 42.64                  | 44.40                       |
|                    | <b>S</b>          | 34.21   | 29.82                   | 29.65                      | 30.43             | 13.23                            | 39.14                  | 36.78                       |
|                    | <b>G2</b>         | 15.56   | 6.32                    | 7.47                       | 7.63              | 15.72                            | 18.22                  | 18.82                       |
| <b>Fibroblasts</b> | <b>G1</b>         | 65.42   | 74.85                   | 62.91                      | 54.34             | 34.15                            | 64.95                  | 59.49                       |
|                    | <b>S</b>          | 4.92    | 14.46                   | 9.21                       | 6.36              | 37.51                            | 19.54                  | 21.03                       |
|                    | <b>G2</b>         | 29.66   | 10.70                   | 27.88                      | 39.29             | 28.34                            | 15.50                  | 19.48                       |

## SUPPLEMENTARY FIGURES

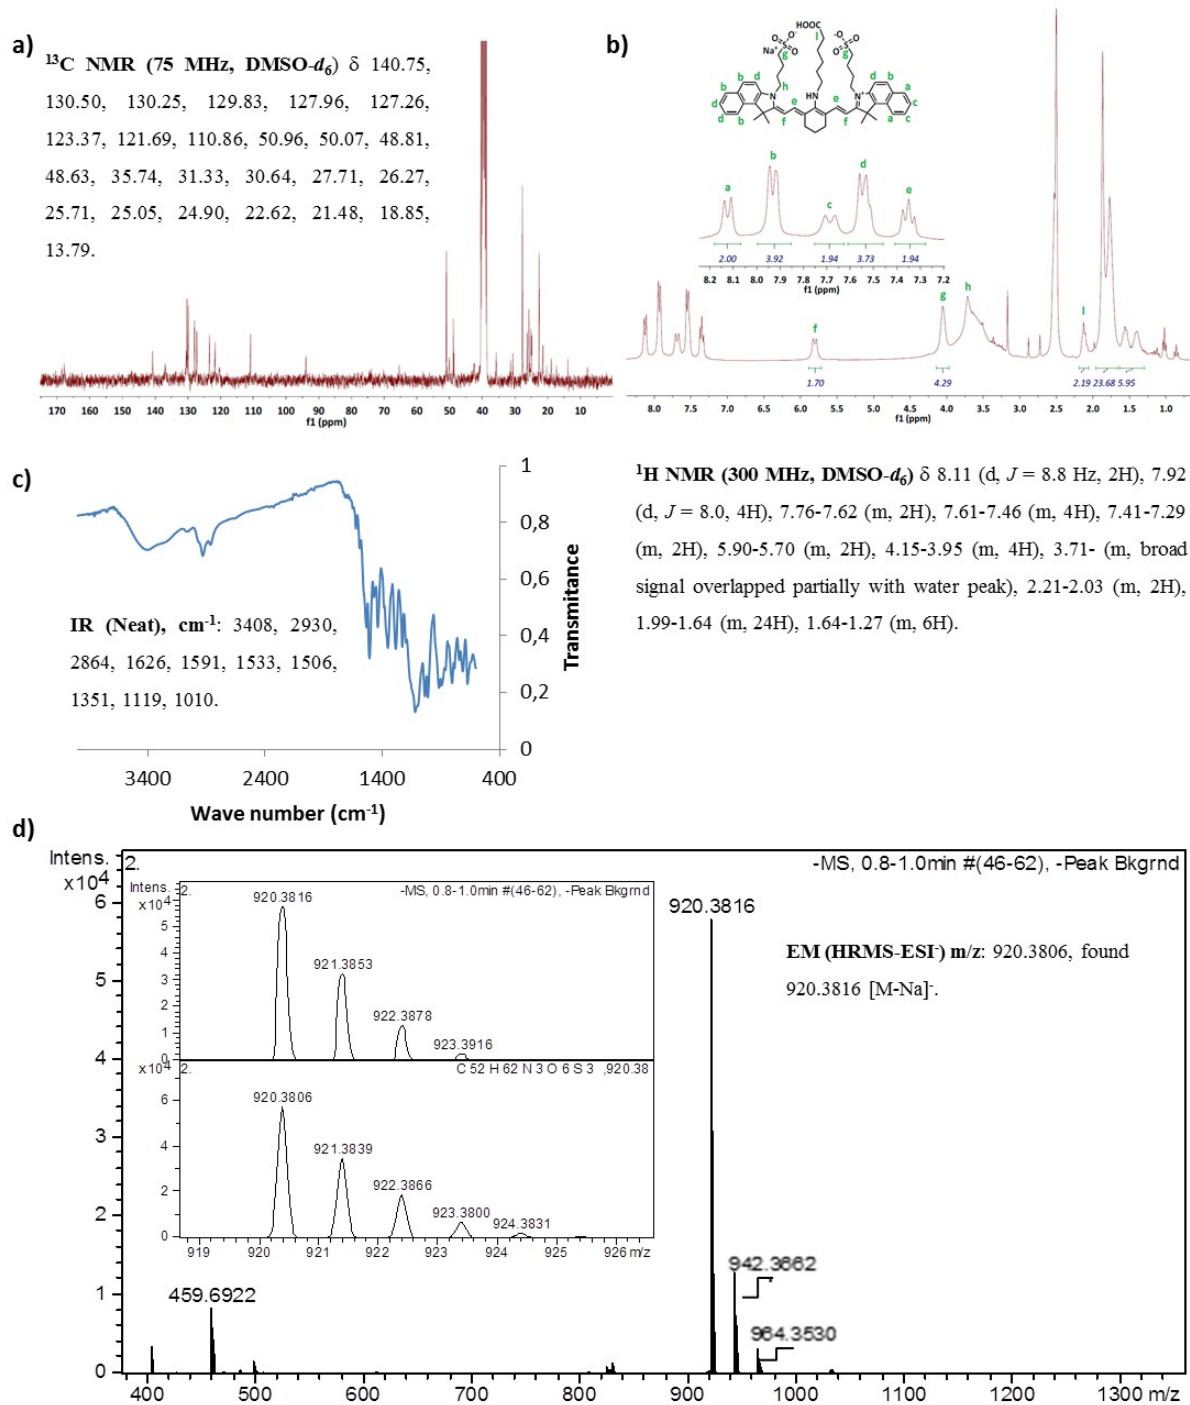

**Figure S1. Characterization of modified IR820-COOH: a) NMR spectroscopy of  $^{13}\text{C}$ ; b) NMR spectroscopy of  $^1\text{H}$ ; c) FTIR; d) Mass spectrometry**

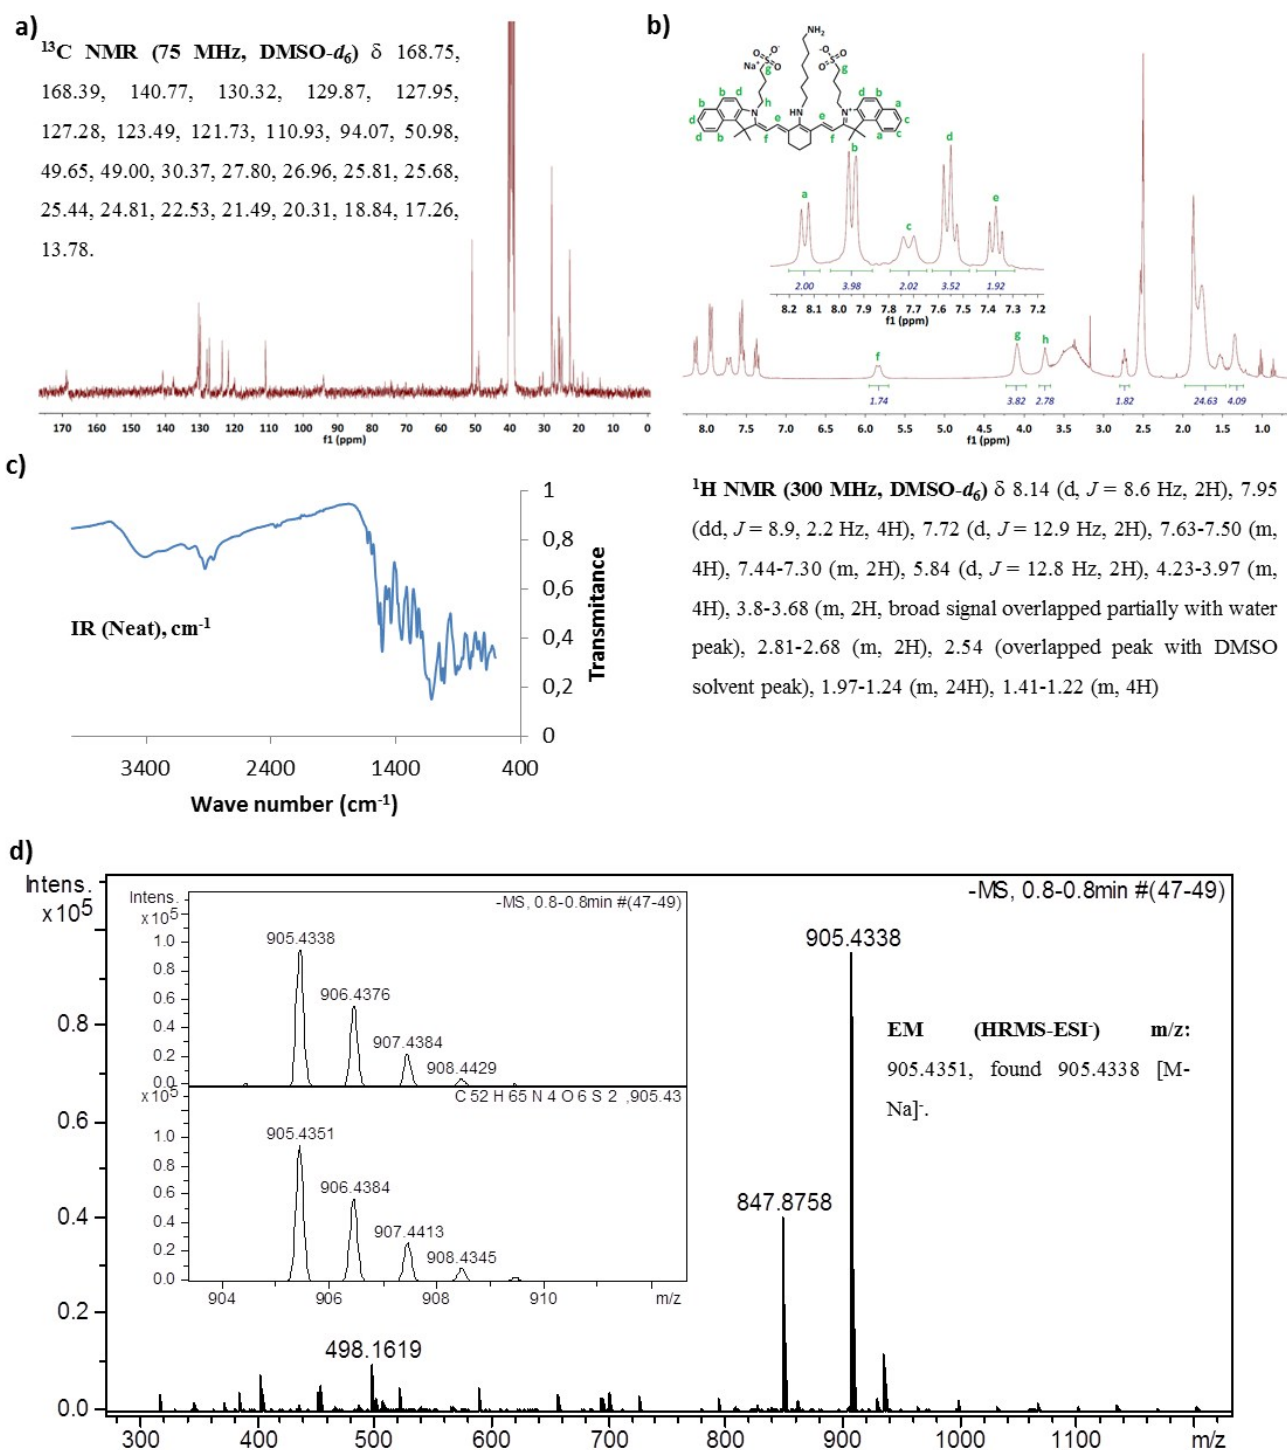

**Figure S2. Characterization of modified IR820-NH<sub>2</sub>: a) NMR spectroscopy of  $^{13}\text{C}$ ; b) NMR spectroscopy of  $^1\text{H}$ ; c) FTIR; d) Mass spectrometry**

a)

$^{13}\text{C}$  NMR (75 MHz, Methanol- $d_4$ )  $\delta$   
176.20, 43.25, 42.43, 22.80.

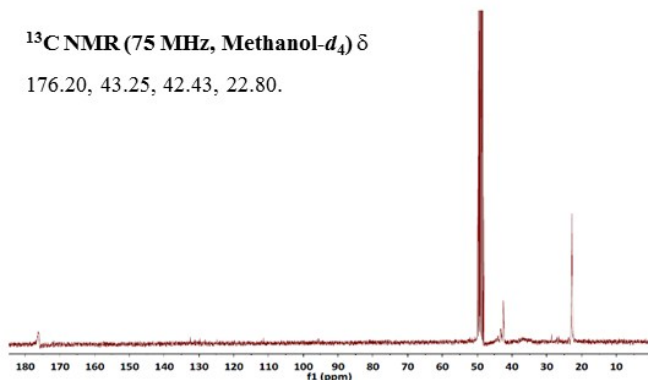

b)

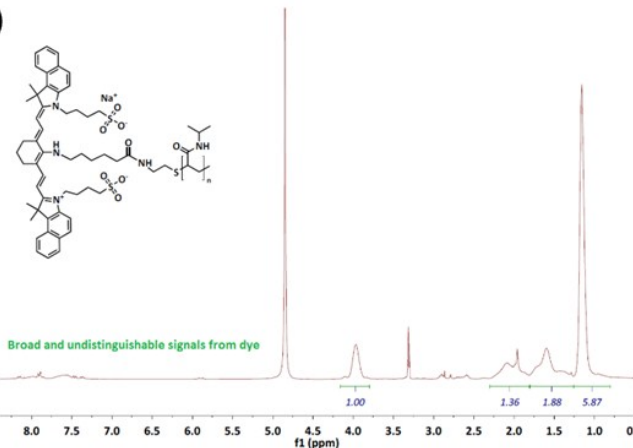

c)

IR (Neat),  $\text{cm}^{-1}$ : 3286, 3072,  
2972, 2934, 1635, 1535,  
1458, 1367, 1171, 1130.

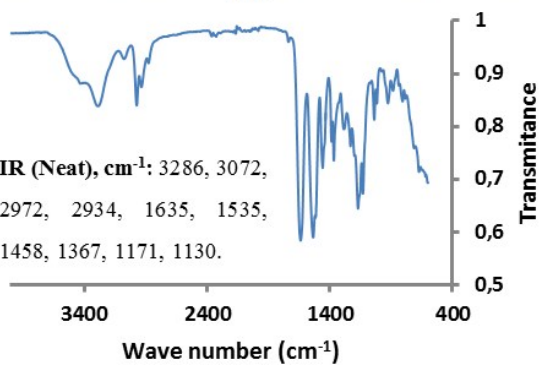

$^1\text{H}$  NMR (300 MHz, Methanol- $d_4$ )  $\delta$  4.16-3.79 (m, 1H), 2.3-1.8  
(m, 1H), 1.8-1.26 (m, 2H), 1.26-0.8 (m, 6H);

**Figure S3. Characterization of PNIPAM-IR820-COOH: a) NMR spectroscopy of  $^{13}\text{C}$ ; b) NMR spectroscopy of  $^1\text{H}$ ; c) FTIR**

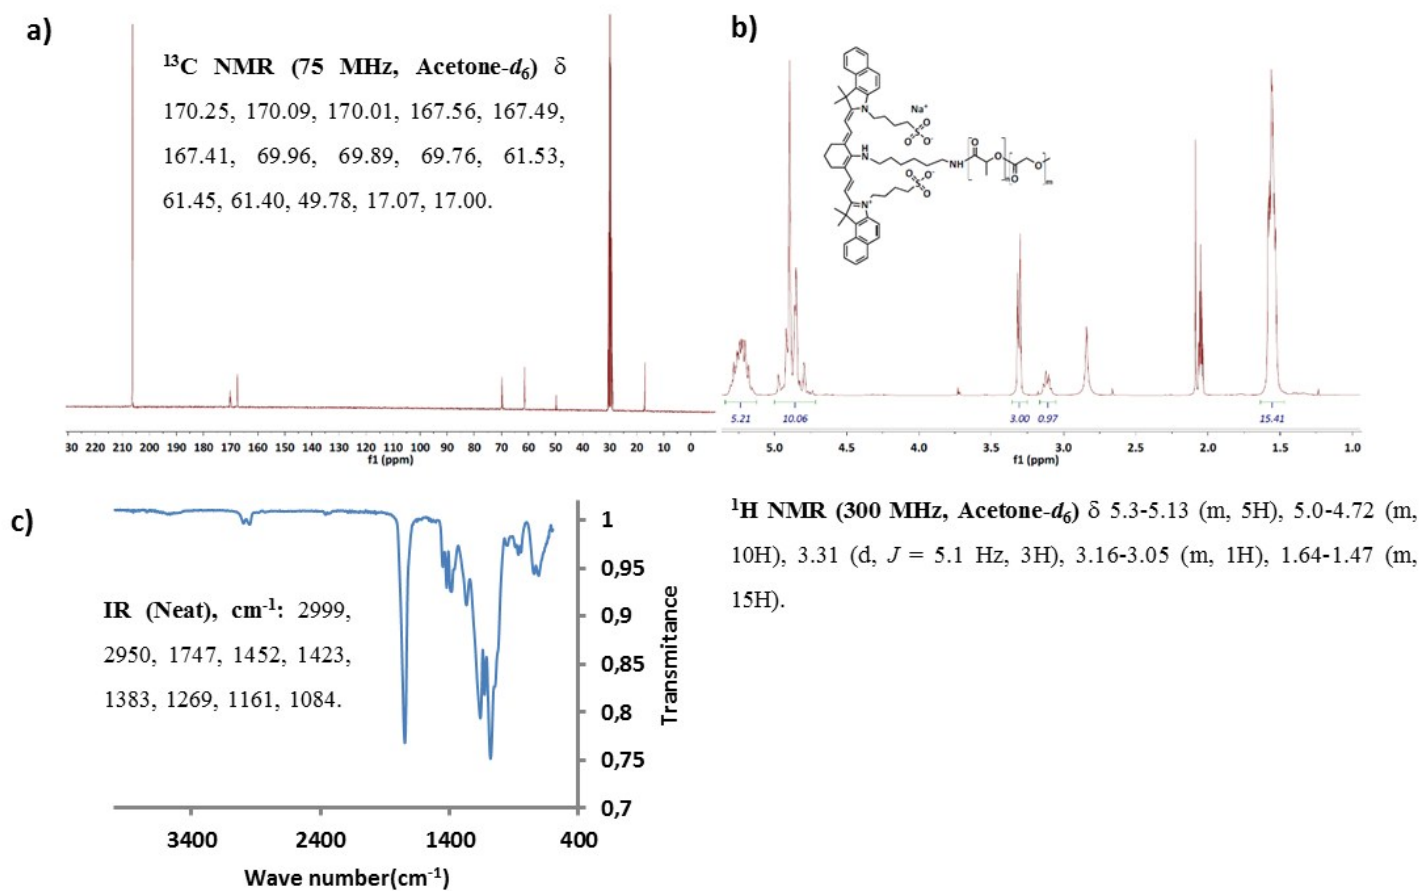

**Figure S4. Characterization of PLGA-IR820-NH<sub>2</sub>: a) NMR spectroscopy of  $^{13}\text{C}$ ; b) NMR spectroscopy of  $^1\text{H}$ ; c) FTIR**

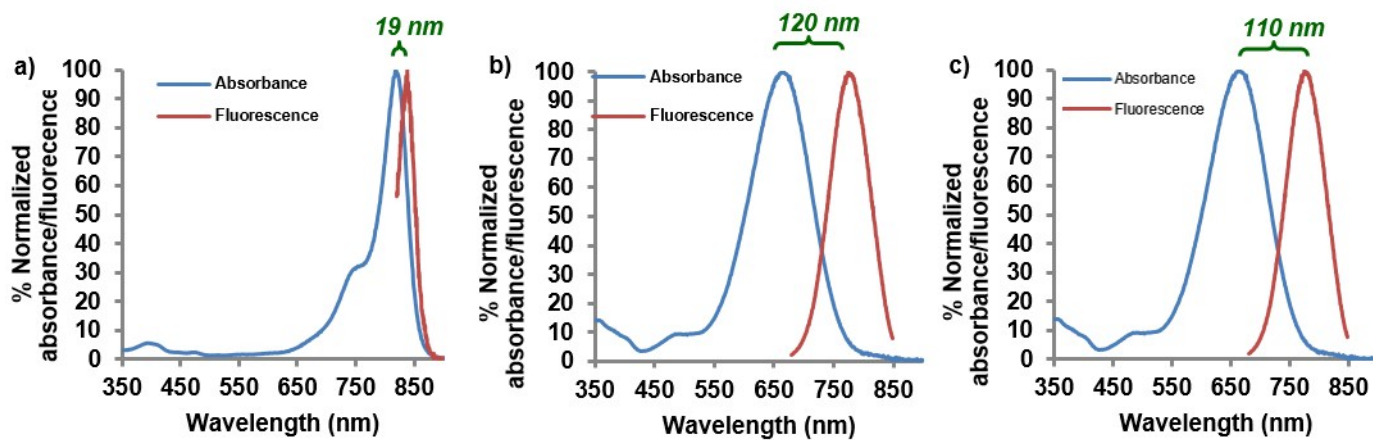

Figure S5. Normalized absorbance and fluorescence spectra in methanol: a) IR-820; b) IR820-COOH; c) IR820-NH<sub>2</sub>.
